# Supplementary material for: Hydrogenation of furfural to furfuryl alcohol over MOF-derived Fe/Cu@C and Fe3O4/Cu@C catalysts
Source: Royal Society of Chemistry journal article supplement (doi:10.1039/d1re00543j), 2022-01-01
Supplement: d1re00543j1.pdf [file d1re00543j1.pdf]

## Supporting Information

### Experimental

#### N<sub>2</sub>O pulse chemisorption

The Cu characteristics were determined by N<sub>2</sub>O pulse chemisorption on a chemical adsorption instrument (PCA-1200, Builder, China). Before the measurement, the catalyst was reduced at 473 K for 2 h in H<sub>2</sub>. The N<sub>2</sub>O chemisorption was carried out with 3 vol% N<sub>2</sub>O/He mixture. The Cu surface area was calculated by assuming a N<sub>2</sub>O/Cu molar stoichiometry of 0.5:1 and a Cu surface density of  $1.46 \times 10^{19}$  Cu atom/m<sup>2</sup>.

The metal surface area (MSA), metal dispersion ( $D_{\text{Cu}}$ ) and particle size ( $d_{\text{Cu}}$ ) of Cu were calculated as

$$\text{MSA} = \frac{2 \times \text{N}_2\text{O adsorption} \times N_{\text{A}}}{1.46 \times 10^{19}} \quad (1)$$

$$D_{\text{Cu}} = \frac{n_{\text{surface Cu}}}{n_{\text{total Cu}}} \times 100\% \quad (2)$$

$$d_{\text{Cu}} = \frac{104}{D_{\text{Cu}} (\%)} \quad (3)$$

#### Analysis of the reaction products

The liquid products collected from the reaction mixture were analyzed by a gas chromatograph (Shimadzu GC-14C). The conditions for the analysis were as follows: a 50 m HP-PONA capillary column, a flame ionization detector, 30 mL/min N<sub>2</sub> flow as a carrier gas, detector temperature 533 K, and the oven temperature programmed from 313 K to 522 K at the speed of 10 K/min. The products were identified by gas chromatography/mass spectrometry (Agilent GC/MS 5890). The carbon balance of all examined catalysts was in the range of 93 to 98%.

The furfural conversion, the selectivity and yield of furfural alcohol were calculated using the formulas as follows:

$$\text{Conversion} = \frac{n_{(\text{furfural})\text{before}} - n_{(\text{furfural})\text{after}}}{n_{(\text{furfural})\text{before}}} \times 100\% \quad (4)$$

$$\text{Selectivity} = \frac{n_{(\text{furfuryl alcohol})}}{n_{(\text{furfural})\text{before}} - n_{(\text{furfural})\text{after}}} \times 100\% \quad (5)$$

$$\text{Yield} = \frac{n_{(\text{furfuryl alcohol})}}{n_{(\text{furfural})\text{before}}} \times 100\% \quad (6)$$

Here,  $n_{(\text{furfural})\text{before}}$  is the initial furfural concentration in the reactor,  $n_{(\text{furfural})\text{after}}$  and  $n_{(\text{furfuryl alcohol})}$  are the furfural and furfuryl alcohol concentrations after the reaction, respectively.

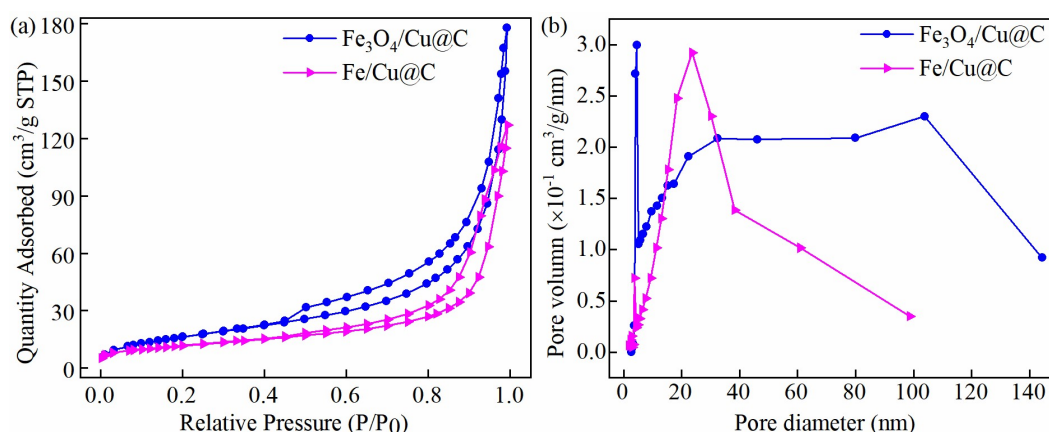

Fig. S1 (a) N<sub>2</sub> adsorption-desorption isotherms and (b) pore size distribution curves of Fe/Cu@C (Fe<sup>3+</sup> 10 wt%) and Fe<sub>3</sub>O<sub>4</sub>/Cu@C (Fe<sup>3+</sup> 10 wt%).

Table S1 Catalytic activity of this research compared to other literatures.

| No. | Catalysts                            | Reaction conditions                                                                                                  | Con. (%) | Sel. <sup>a</sup> (%) | Yield (%) | Ref.      |
|-----|--------------------------------------|----------------------------------------------------------------------------------------------------------------------|----------|-----------------------|-----------|-----------|
| 1   | Fe/Cu@C                              | 20 mg catalyst, 1 mmol furfural, 10 mL <i>i</i> -propanol, 1 MPa H <sub>2</sub> , 457 K, 4 h                         | 68.5     | 98.2                  | 67.3      | This work |
| 2   | Fe <sub>3</sub> O <sub>4</sub> /Cu@C | 20 mg catalyst, 1 mmol furfural, 10 mL <i>i</i> -propanol, 1 MPa H <sub>2</sub> , 457 K, 4 h                         | 86.3     | 99.6                  | 86.0      | This work |
| 3   | Cu/C                                 | 0.1 g catalyst, 0.6 g furfural, 15.4 g <i>i</i> -propanol, 443 K, 2 MPa H <sub>2</sub> , 3 h                         | 99.6     | 99.3                  | —         | 1         |
| 4   | 5 wt% Pd/MCM-41                      | 2.1 mL furfural, 5 mL octane, 30 bar H <sub>2</sub> , 413 K, 3 h                                                     | ~51      | ~59                   | —         | 2         |
| 5   | CuAl+MgO                             | 0.04 g catalyst, 0.08 g furfural, 3.92 g ethanol, 100 μL NaOH solution (1.0 mol/L) 373 K, 5 MPa H <sub>2</sub> , 2 h | 100      | 98.5                  | 98.5      | 3         |
| 6   | Ni-Cu/SiO <sub>2</sub>               | 0.2 g catalyst, 2.415 mmol furfural, 10 mL methanol, 20 bar H <sub>2</sub> , 373 K, 2 h                              | 63       | 68                    | 43        | 4         |
| 7   | Na-Cu@TS-1                           | 0.3 g catalyst, 0.3 g furfural, 23.56 g <i>i</i> -propanol, 10 bar H <sub>2</sub> , 383 K, 2 h                       | 93.0     | 98.1                  | —         | 5         |
| 8   | Pt3Fe/CeO <sub>2</sub>               | 20 mg catalyst, 200 μL furfural, 10 mL <i>i</i> -propanol, 20 bar H <sub>2</sub> , 373 K, 4 h                        | 99.8     | > 99.0                | —         | 6         |

<sup>a</sup> Selectivity of furfuryl alcohol.

- [1] C. Wang, Y. Liu, Z. Cui, X. Yu, X. Zhang, Y. Li, Q. Zhang, L. Chen and L. Ma, *ACS Sustainable Chem. Eng.*, 2020, **8**, 12944–12955.
- [2] Z. Yi, H. Xu, D. Hu and K. Yan, *J. Alloy. Compd.*, 2019, **799**, 59–65.
- [3] Y. Shao, Q. Li, X. Dong, J. Wang, K. Sun, L. Zhang, S. Zhang, L. Xu, X. Yuan and X. Hu, *Fuel*, 2021, **293**, 120457.
- [4] P. Weerachawanasak, P. Krawmanee, W. Inkamhaeng, F.J. Cadete Santos Aires, T. Sooknoi and J. Panpranot, *Catal. Commun.*, 2021, **149**, 106221.
- [5] P. Cao, L. Lin, H. Qi, R. Chen, Z. Wu, N. Li, T. Zhang and W. Luo, *ACS Catal.*, 2021, **11**, 16, 10246–10256.
- [6] X. Gao, S. Tian, Y. Jin, X. Wan, C. Zhou, R. Chen, Y. Dai and Y. Yang, *ACS Sustainable Chem. Eng.*, 2020, **8**, 12722–12730.
